# Supplementary material for: On the ecosystemic network of saliva in healthy young adults
Source: PubMed Central journal article supplement — ISME J. 2017 Jan 10;11(5):1218–31. doi: 10.1038/ismej.2016.199 (PMC5475835; doi:10.1038/ismej.2016.199), 2017-01-10
Supplement: ismej2016199x3.pdf [file ismej2016199x3.pdf]

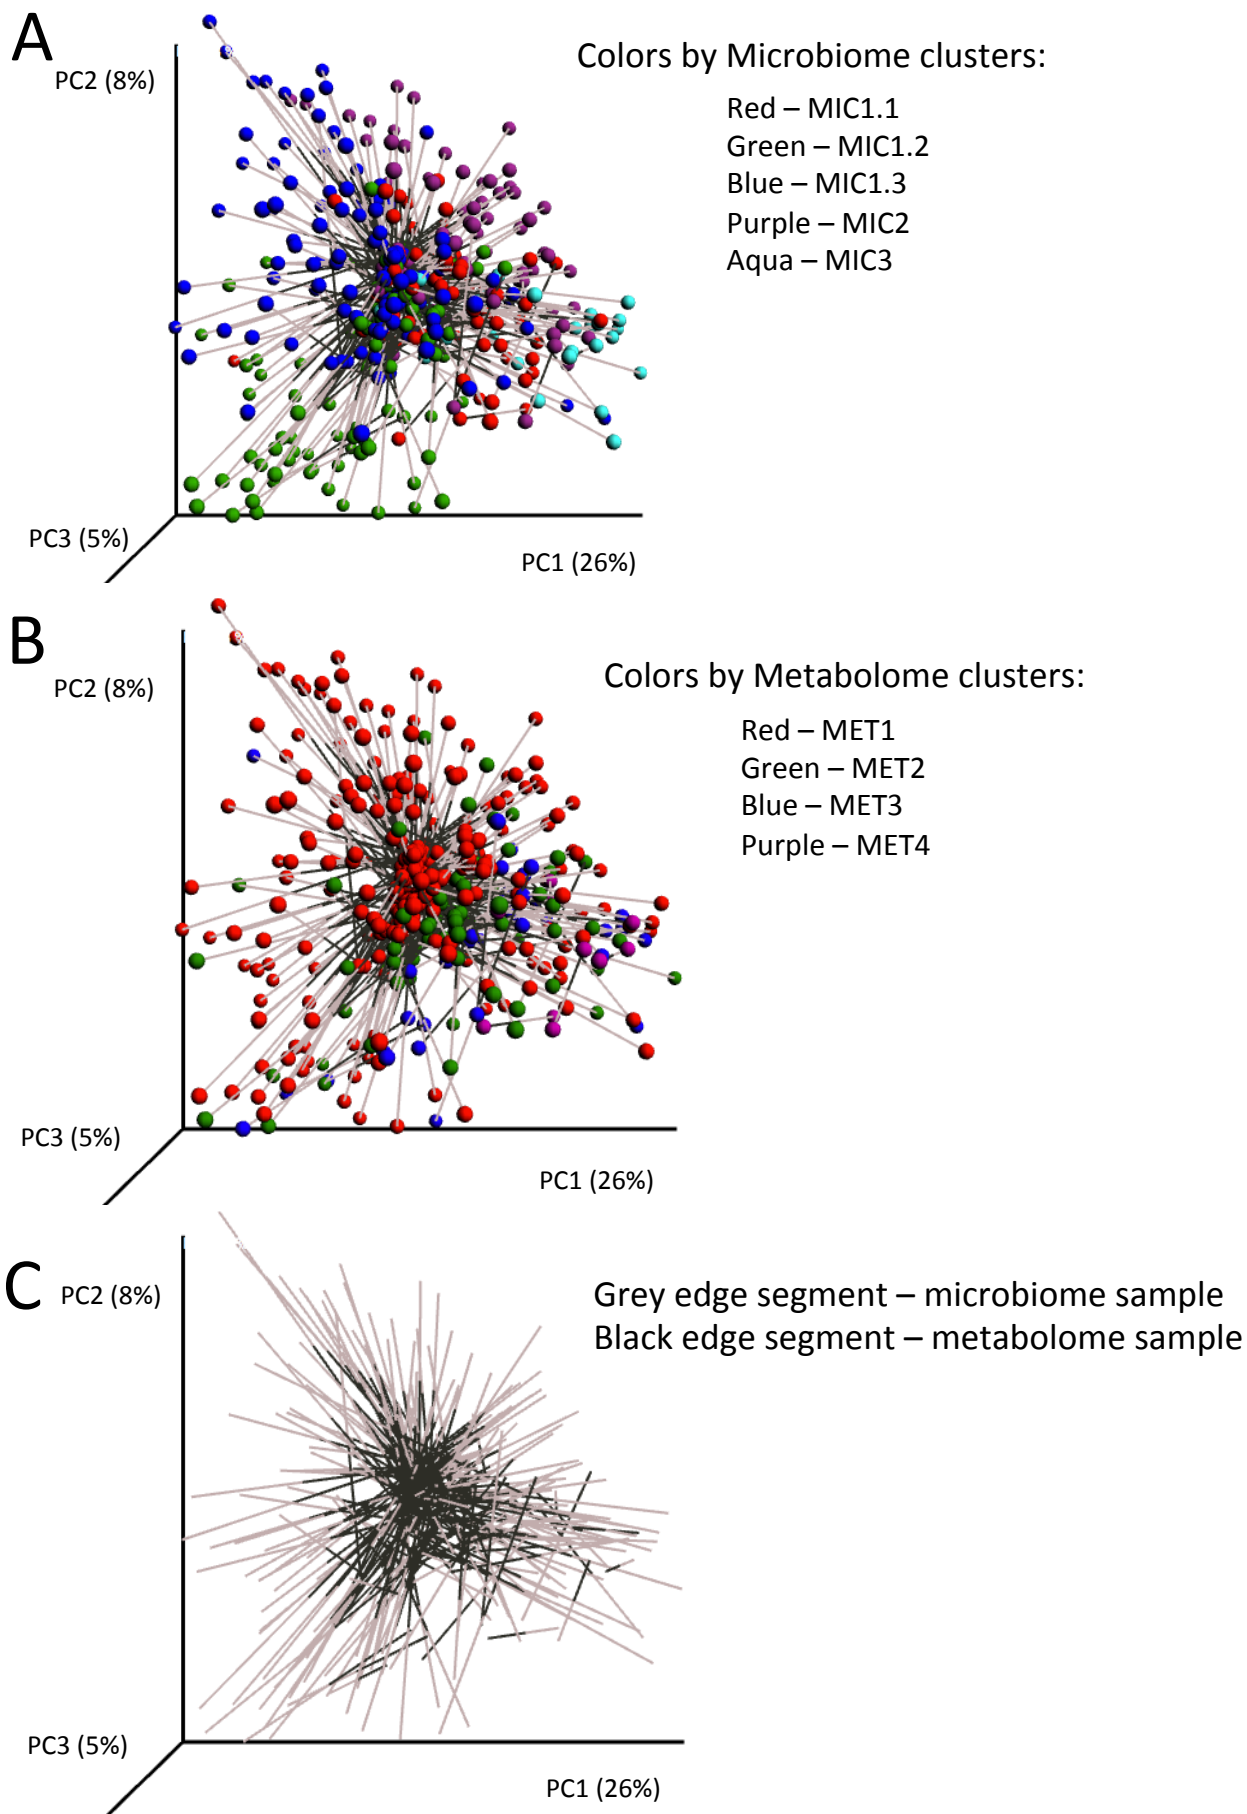

**Supplementary Figure S1.** Relation between the microbiome and metabolome datasets: Superimposed PCA plots of microbiome and metabolome datasets (Procrustes analysis,  $p < 0.0001$ ,  $M^2 = 0.905$ ): A) labeled by microbiome cluster; B) labeled by metabolome cluster; C) without labels, where grey edges – indicate the microbiome sample; black edges – the metabolome sample.

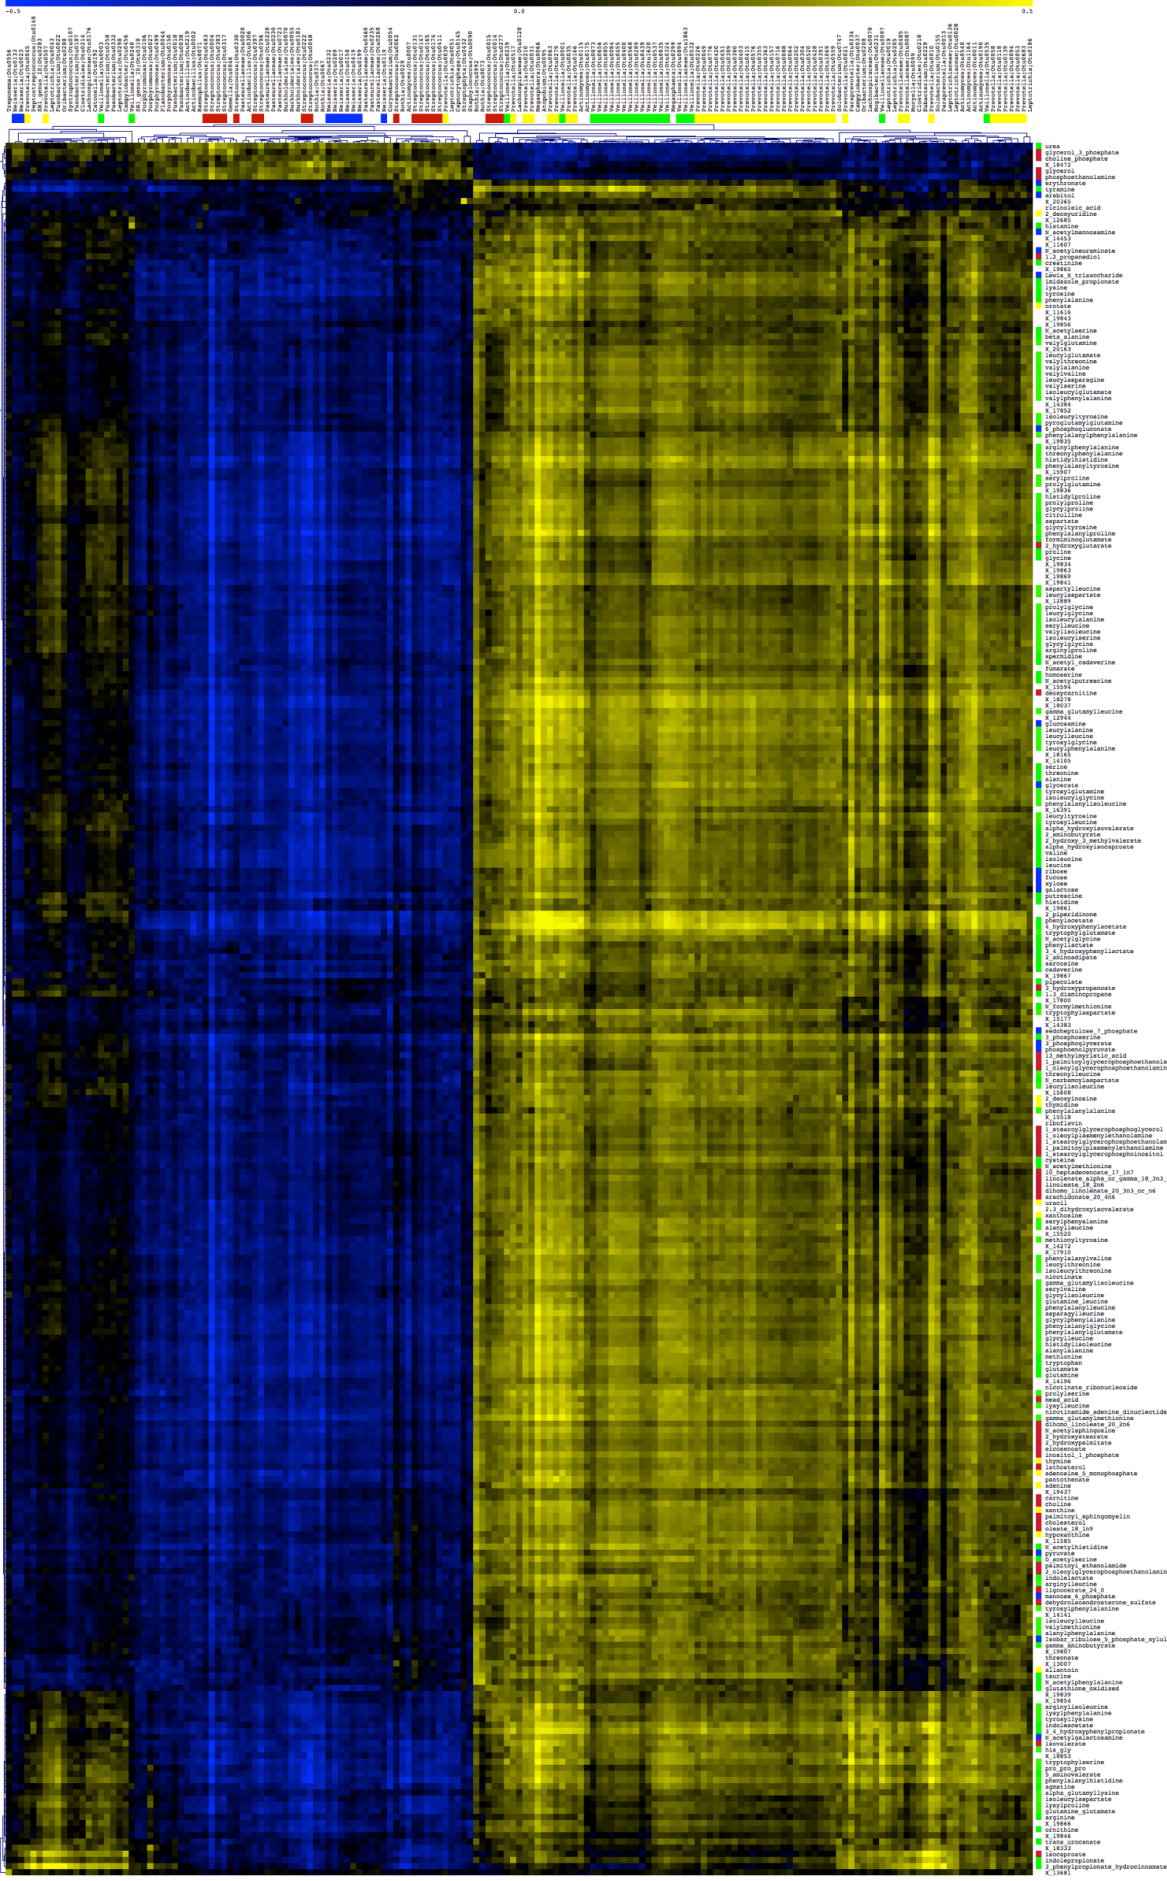

**Supplementary figure S2.** Correlations between microbial taxa and metabolites. Average linkage hierarchical clustering. Spearman Rank Correlation matrix of Spearman  $r$  values of the significant OTUs (columns) vs significant metabolites (rows). Color scale visualizes  $r$  values from low (blue), to zero (black) to high (yellow). OTUs belonging to the same major genera are highlighted in the same color: *Prevotella* – yellow, *Veillonella* – green, *Streptococcus* – red, *Neisseria* – blue. Metabolites belonging to Amino acid and Peptide pathways are highlighted in green, to Carbohydrates – in blue, Lipids – in red and Nucleotides – in yellow.

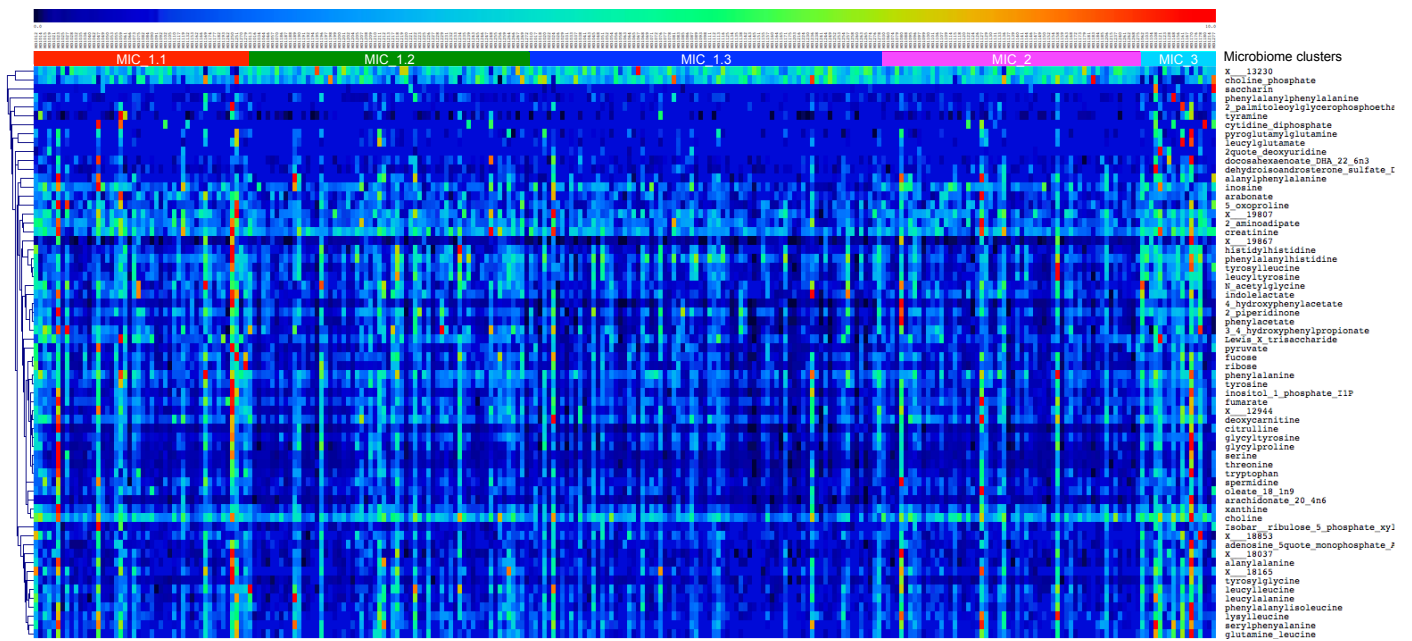

**Supplementary figure S3.** Metabolites that significantly discriminated among microbiome sample clusters, using SAM analysis.
